# Supplementary material for: Facile synthesis of germanium–reduced graphene oxide composite as anode for high performance lithium-ion batteries
Source: Royal Society of Chemistry journal article supplement (doi:10.1039/c4ra08797f), 2014-10-16
Supplement: c4ra08797f1.pdf [file c4ra08797f1.pdf]

### Supporting Information

Facile synthesis of germanium-reduced graphene oxide nanocomposite anode for high performance lithium batteries

Xiongwu Zhong,<sup>a</sup> Jiaqing Wang,<sup>a</sup> Weihan Li,<sup>a</sup> Xiaowu Liu,<sup>a</sup>

Zhenzhong Yang,<sup>b</sup> Lin Gu,<sup>b</sup> Yan Yu<sup>a</sup>

<sup>a</sup> CAS Key Laboratory of Materials for Energy Conversion, Department of Materials Science and Engineering, University of Science and Technology of China, Hefei 230026, Anhui, P. R. China. E-mail: yanyumse@ustc.edu.cn

<sup>b</sup> Beijing National Laboratory for Condensed Matter Physics, The Institute of Physics, Chinese Academy of Sciences, Beijing 100190, P. R. China

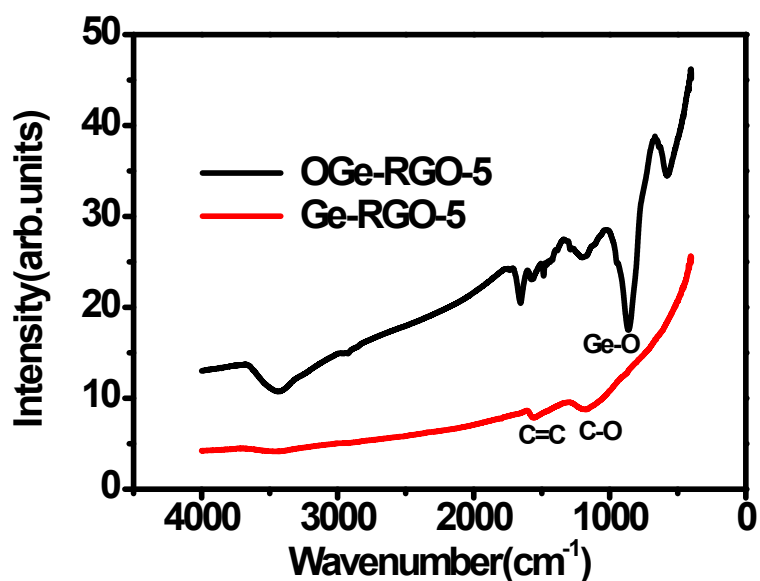

Fig. S1 Fourier transform infrared (FTIR) spectroscopy of the Ge-RGO-5 nanocomposites and the OGe-RGO-5 nanocomposites.

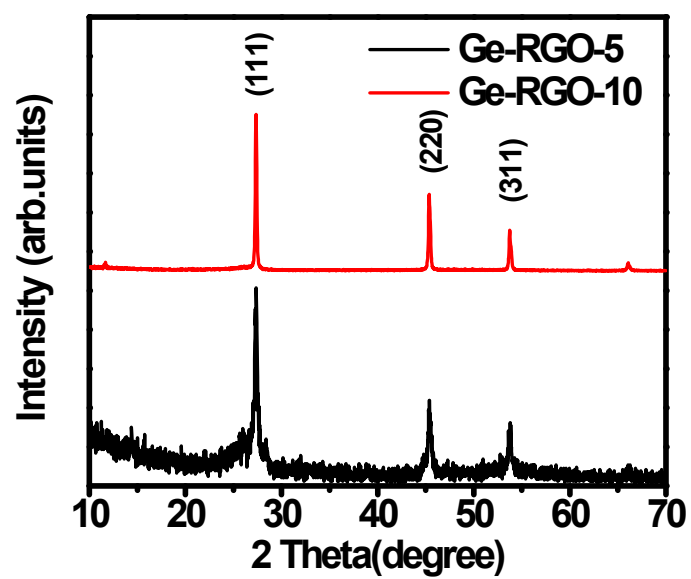

Fig. S2 XRD patterns of the Ge-RGO-5 and Ge-RGO-10 nanocomposites.

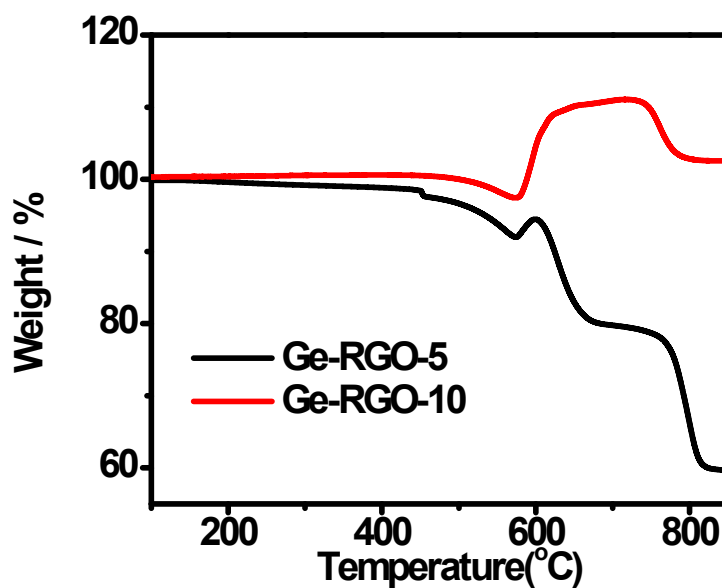

Fig. S3 Thermogravimetric analysis (TGA) of the Ge-RGO-5 and Ge-RGO-10 nanocomposites. The content of Ge in the Ge-RGO-5 and Ge-RGO-10 nanocomposites estimated from the TGA is ca. 39.3 and 70.5 wt%. (Note: Ge was totally oxidized into  $\text{GeO}_2$ ). This analysis was taken in air with a heating rate of  $10\text{ }^\circ\text{C min}^{-1}$ .

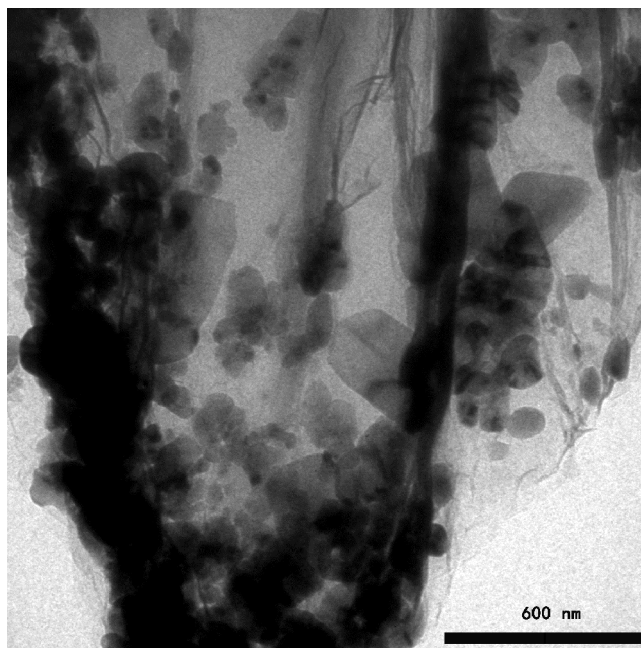

Fig. S4 TEM micrograph of the Ge-RGO-10 nanocomposites.

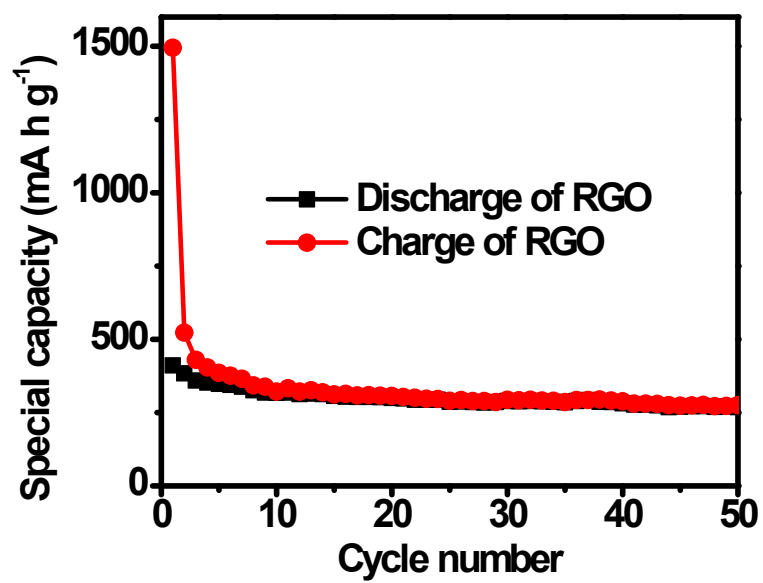

Fig. S5 Cycle performance of RGO electrode cycled between 0.005 V and 1.2 V vs. Li<sup>+</sup>/Li at a current density of 0.1 A g<sup>-1</sup>.

| Samples              | Ge precursors           | Synthetic methods          | Capacity [mA h g <sup>-1</sup> ] | Current density [A g <sup>-1</sup> ] |
|----------------------|-------------------------|----------------------------|----------------------------------|--------------------------------------|
| G-GeNW (Ref 31)      | GeO <sub>2</sub> powder | Arc discharge method       | 430 (after 50 cycles)            | 1.6                                  |
|                      |                         |                            | 356                              | 3.2                                  |
| G-GeNP (Ref 32)      | Ge powder               | Chemical vapour deposition | 675 (after 400 cycles)           | 0.4                                  |
|                      |                         |                            | 484                              | 2.0                                  |
| 3D G-GeNP (Ref 49)   | GeO <sub>2</sub>        | Chemical reduction         | 832 (after 50 cycles)            | 0.16                                 |
|                      |                         |                            | 400                              | 2.0                                  |
| GeNPs-GR (Ref 50)    | GeCl <sub>4</sub>       | Chemical reduction         | 532                              | 0.2                                  |
| Ge-RGO-5 (this work) | TMOG                    | solvothermal reaction      | 850 ( after 150 cycles)          | 1                                    |
|                      |                         |                            | 790 (after 150 cycles)           | 2                                    |

Table S1 Comparison of discharge capability of Ge-RGO nanocomposites with other Ge-RGO nanocomposites electrodes reported recently.
